# Supplementary material for: The synthesis of hierarchical high-silica beta zeolites in NaF media
Source: Royal Society of Chemistry journal article supplement (doi:10.1039/c8ra09347d), 2019-01-01
Supplement: c8ra09347d1.pdf [file c8ra09347d1.pdf]

## Supplementary Information

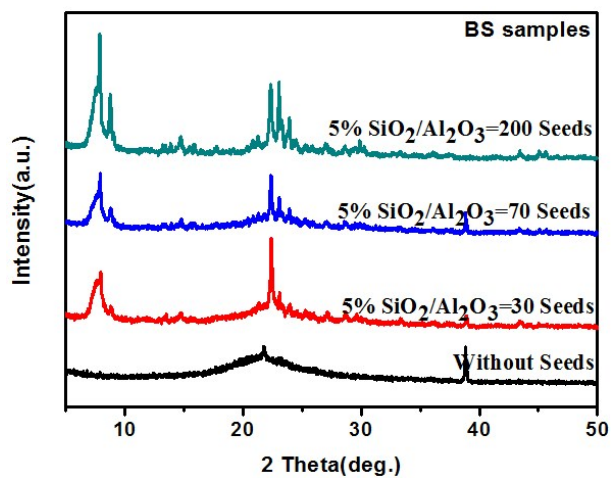

Fig. S1 The XRD patterns of the BS samples with the seeds with different SiO<sub>2</sub>/Al<sub>2</sub>O<sub>3</sub> ratios.

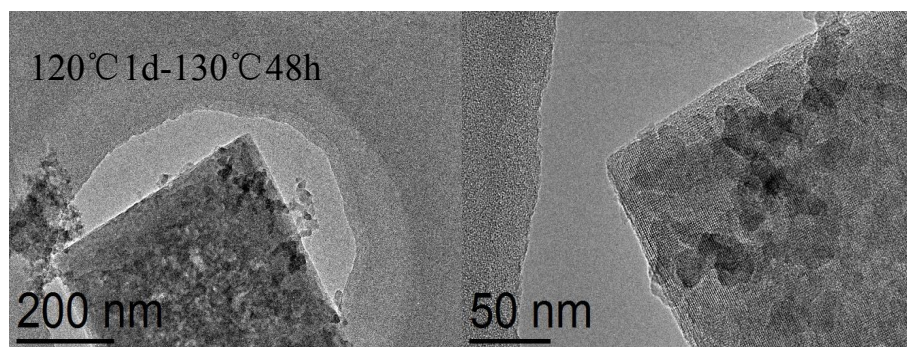

Fig.S2 TEM images of BS-2 sample obtained after crystallization (120°C 1d-130°C 2d).
